# Supplementary material
Source: PubMed Central journal article supplement (PMC3907220)
Supplement: mmc1.pdf [file mmc1.pdf]

# Size Influences the Effect of Hydrophobic Nanoparticles on Lung Surfactant Model Systems

*Mridula.V. Dwivedi<sup>†‡</sup>, Rakesh Kumar Harishchandra<sup>†||</sup>, Olga Koshkina<sup>⊥¶</sup>, Michael Maskos<sup>§¶</sup>,  
Hans-Joachim Galla<sup>†\*</sup>*

<sup>†</sup> Institute of Biochemistry, Westfälische Wilhelms Universität, Wilhelm-Klemm-Str.2, 48149 Münster, Germany.

<sup>‡</sup> NRW International graduate school of chemistry, University of Muenster, Wilhelm-Klemm-Str. 10, 48149 Muenster, Germany

<sup>⊥</sup> BAM Federal Institute for Materials Research and Testing, Unter den Eichen 87, 12205 Berlin, Germany

<sup>§</sup> Institute of Physical Chemistry, Johannes Gutenberg University, Jakob-Welder Weg 11, 55128 Mainz, Germany.

<sup>¶</sup> Institut für Mikrotechnik Mainz (IMM), Carl-Zeiss-Str. 18-20, 55129, Mainz, Germany.

<sup>||</sup> current address: Dept. of Chemistry & Biochemistry Worcester Polytechnic Institute (WPI) 60 Prescott Street, Worcester, MA 01605 USA.

\*Corresponding author: [gallah@uni-muenster.de](mailto:gallah@uni-muenster.de)

Mailing address: Institute of Biochemistry, Westfälische Wilhelms Universität, Wilhelm-Klemm-Str. 2, 48149 Münster, Germany. Tel.: +49-251-8333200. Fax: +49-251-8333206.

Keywords: Lung Surfactant, nanoparticle size, Surface activity, atomic force microscopy, vesicle insertion kinetics, Multilayer protrusion structures.

## Supporting Material

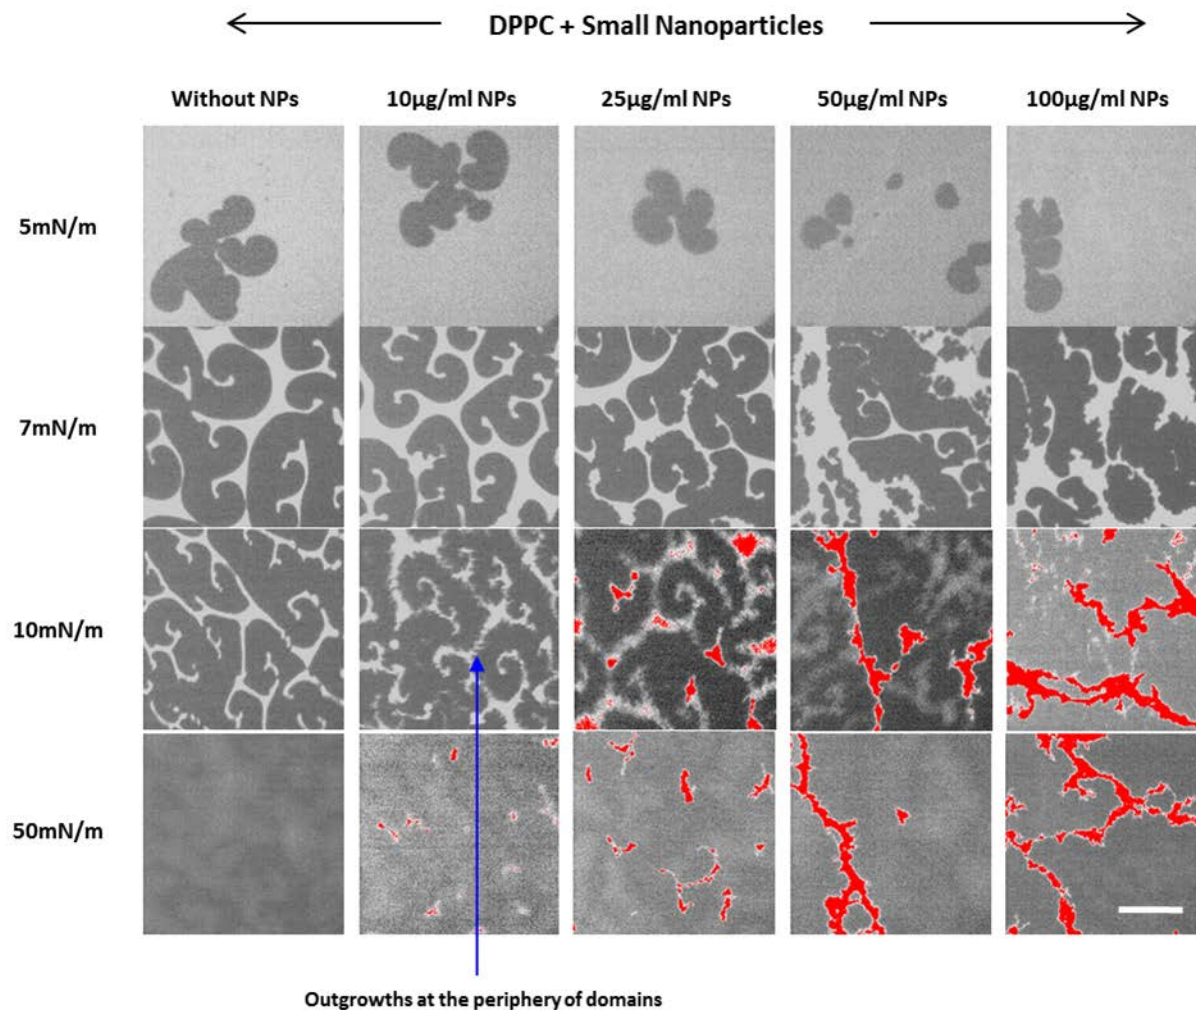

**Figure S1:** Epi-fluorescence microscopy images for DPPC in the presence of increasing concentration of small nanoparticles ( $\sim 12$  nm) on water as the subphase at  $20^\circ\text{C}$ . The DPPC monolayer is doped with 0.5 mol% BODIPY-PC which preferentially partitions into the liquid expanded phase. The images are taken at varying surface pressure values. Scale bar is  $50\ \mu\text{m}$ .

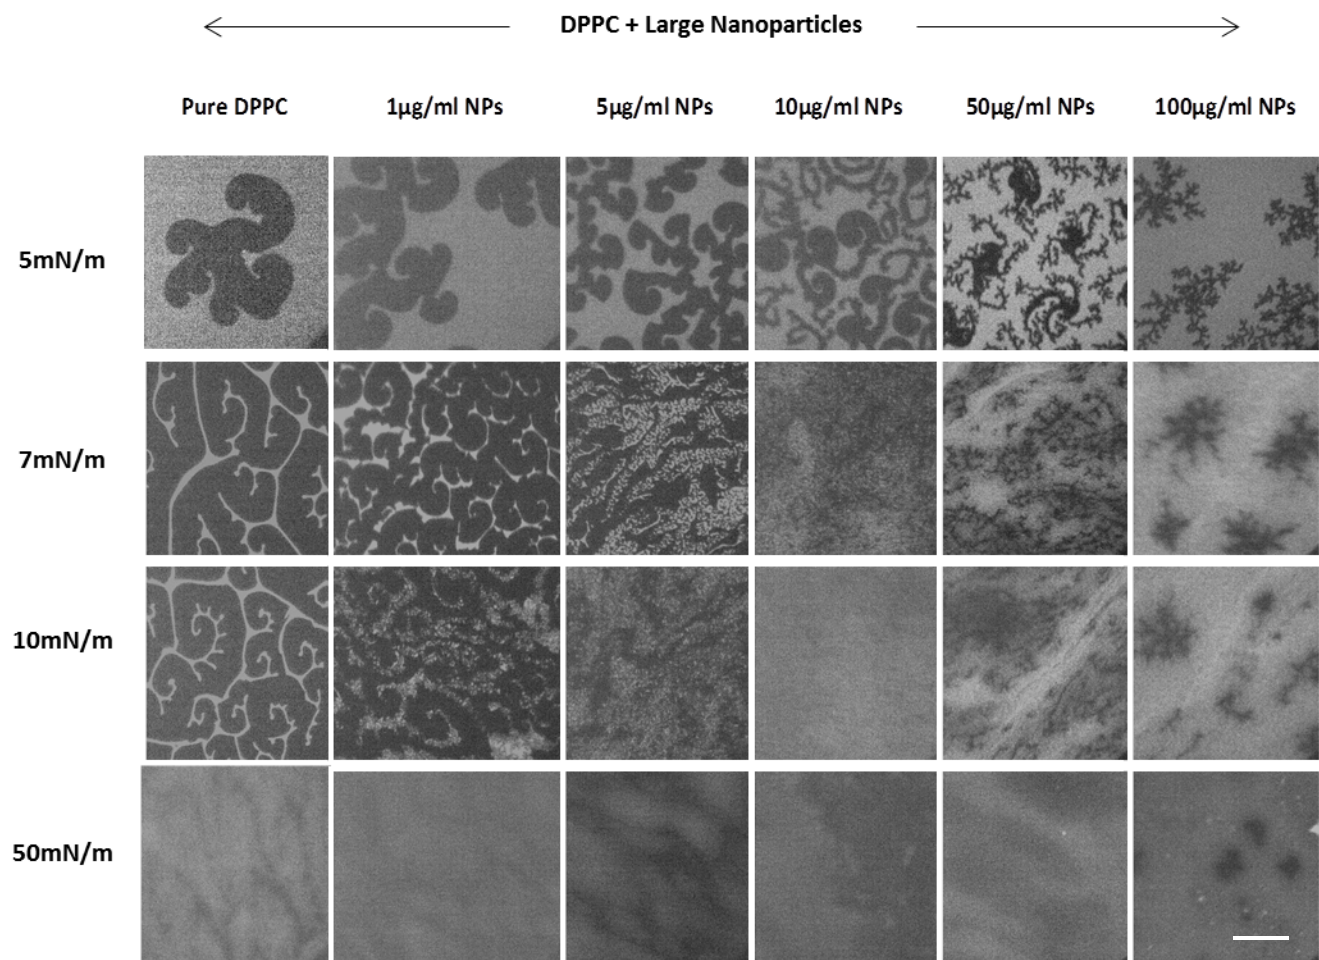

**Figure S2:** Epi-fluorescence microscopy images for DPPC in the presence of increasing concentration of large nanoparticles (~136 nm) on water as the subphase at 20°C. The DPPC monolayer is doped with 0.5 mol% BODIPY-PC which preferentially partitions into the liquid expanded phase. The images are taken at varying surface pressure values. Scale bar is 50  $\mu$ m.

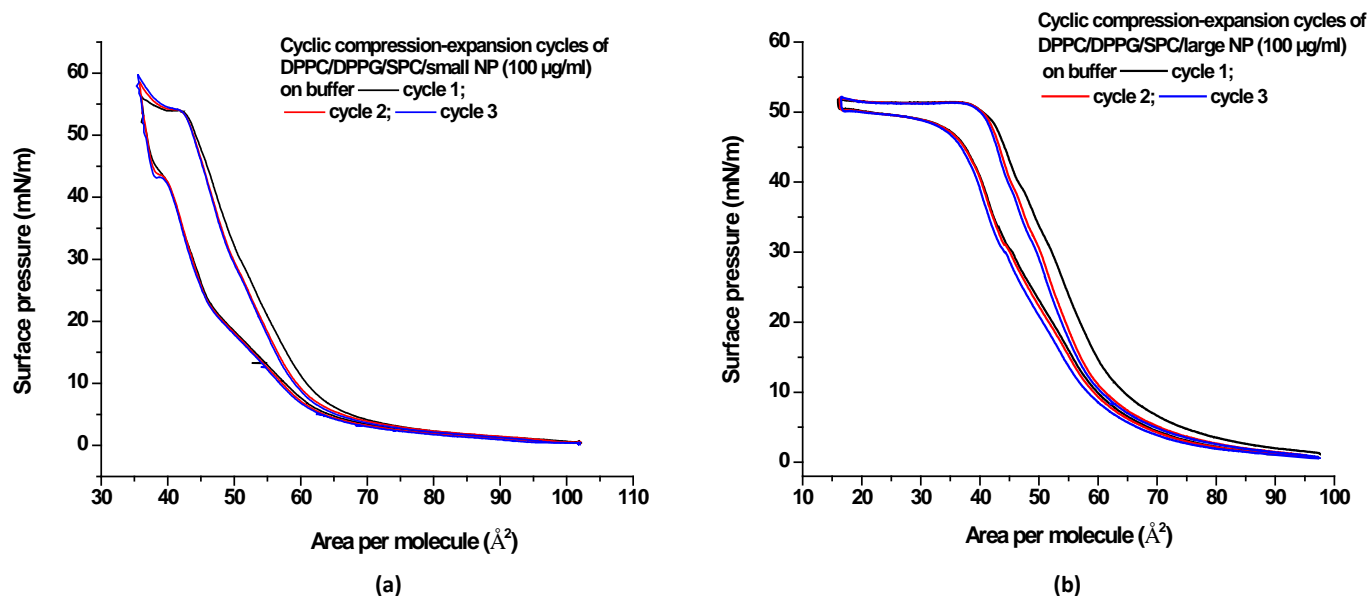

**Figure S3:** (a) Cyclic compression-expansion cycles for DPPC/DPPG/SPC/12 nm NPs (100  $\mu\text{g/ml}$ ). (b) Cyclic compression-expansion cycles for DPPC/DPPG/SPC/136 nm NPs (100  $\mu\text{g/ml}$ ) with 25 mM Hepes + 3 mM  $\text{CaCl}_2$  as the subphase at 20°C.

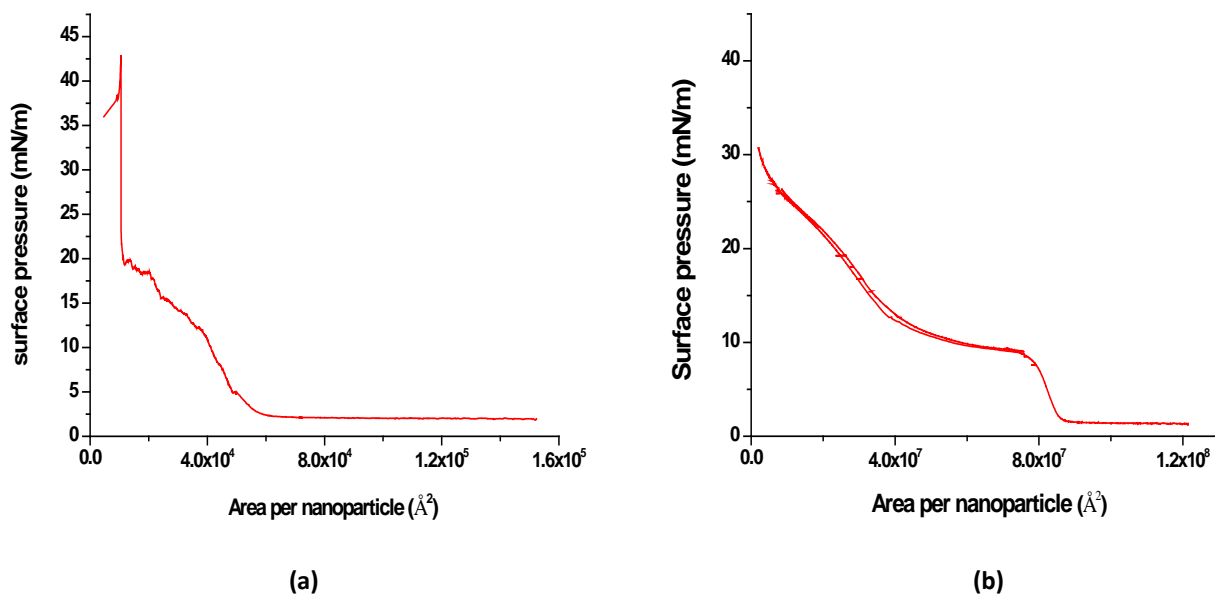

**Figure S4:** Surface pressure-area isotherm of (a) 12 nm nanoparticles ( $\sim 12$  nm) and (b) 136 nm nanoparticles with 25 mM Hepes + 3 mM  $\text{CaCl}_2$  as the subphase at 20°C.

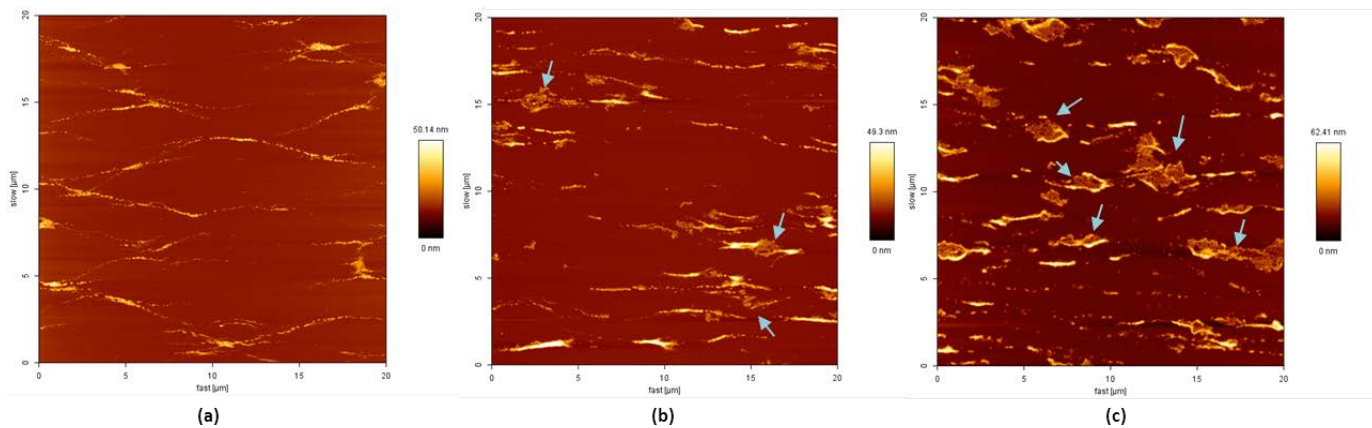

**Figure S5:** AFM topography images of (a) pure DPPC/DPPG/SPC (80:20:0.4 mol %) monolayer lipid film (b) with 50  $\mu\text{g/mL}$  12 nm nanoparticles (c) with 100  $\mu\text{g/mL}$  12 nm nanoparticles transferred at plateau region. The film was compressed on 25 mM Hepes + 3 mM  $\text{CaCl}_2$  as the subphase at 20°C. The clusters of nanoparticles around the protrusion structures are marked by arrows.

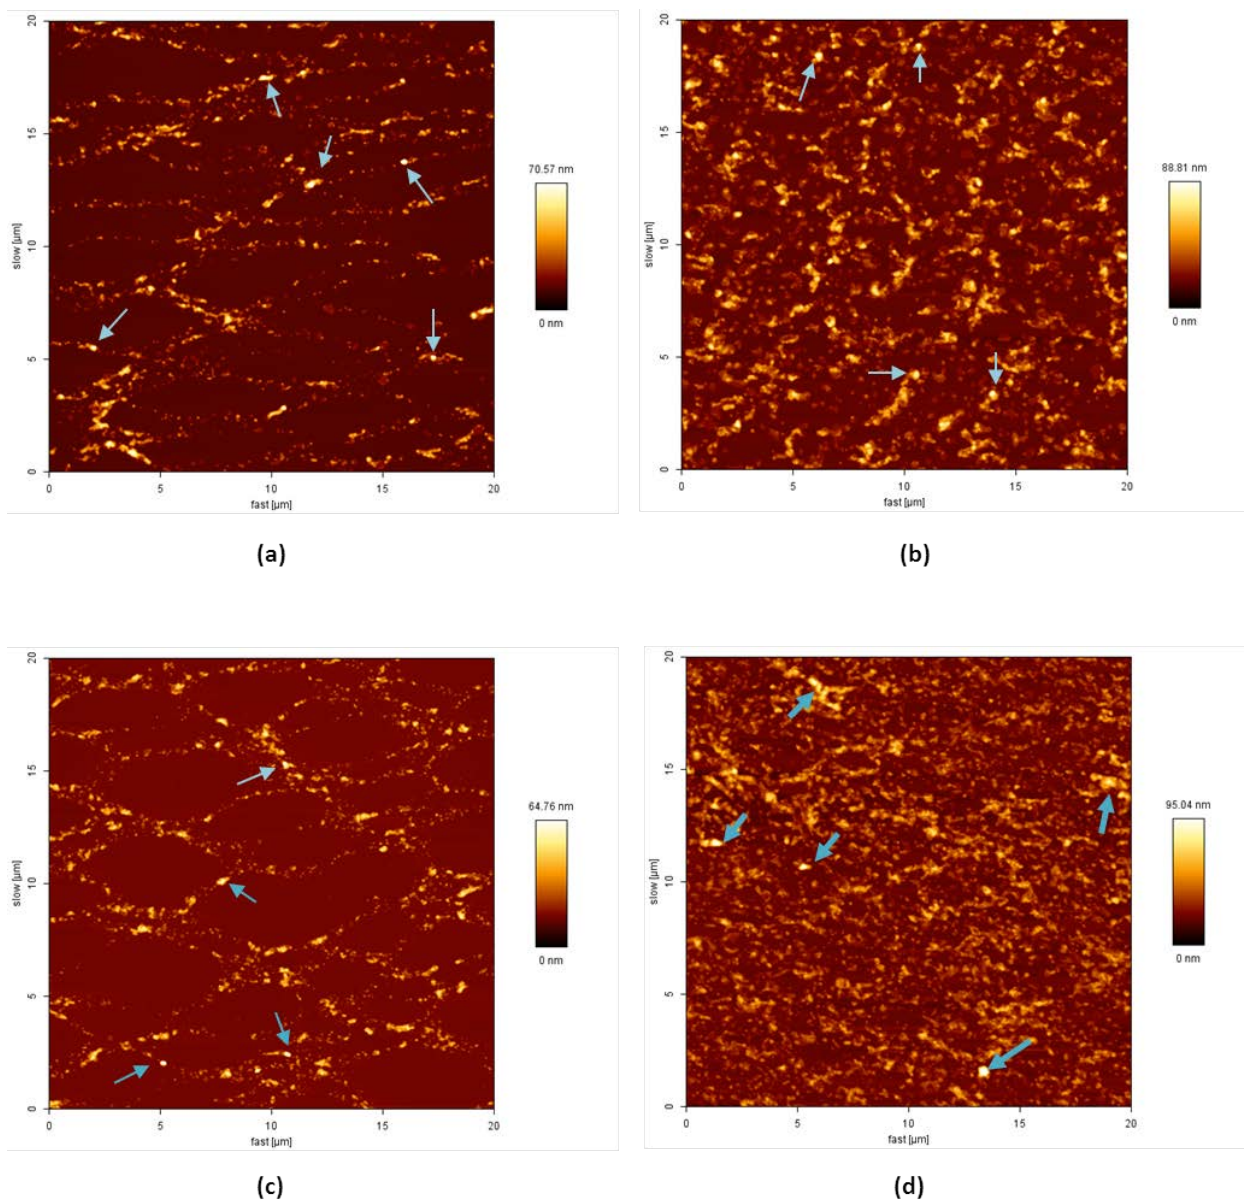

**Figure S6:** AFM topography images of DPPC/DPPG/SPC (80:20:0.4 mol %) monolayer lipid film with (a) 50 μg/mL 136 nm nanoparticles at initial plateau region (b) 50 μg/mL 136 nm nanoparticles at end plateau region (c) 100 μg/mL 136 nm nanoparticles at initial plateau region (d) 100 μg/mL 136 nm nanoparticles at end plateau region. The film was compressed on 25 mM Hepes + 3 mM CaCl<sub>2</sub> as the subphase at 20°C. The clusters of nanoparticles around the protrusion structures are marked by arrows.

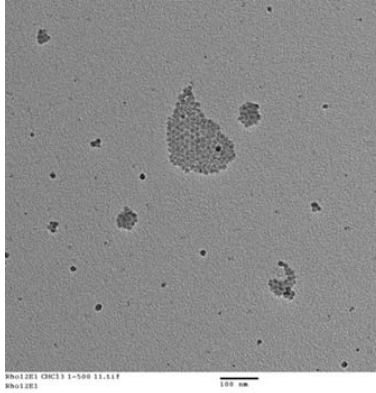

(a)

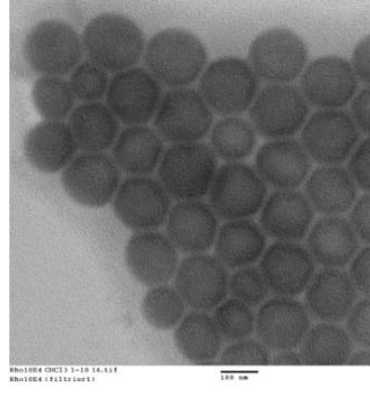

(b)

**Figure S7:** TEM micrograph images of (a) 12 nm nanoparticles (b) 136 nm nanoparticles. Samples were deposited from chloroform. Scale bar is 100 nm.
